# Supplementary material
Source: HighWire-hosted journal article supplement (https://erj.ersjournals.com/content/55/4/1902165)
Supplement: inline-supplementary-material-2 [file inline-supplementary-material-2.pdf]

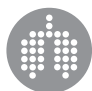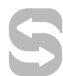

SHAREABLE PDF

# Familial pulmonary arterial hypertension by *KDR* heterozygous loss of function

Mélanie Eyries<sup>1,2,13</sup>, David Montani <sup>3,4,5,13</sup>, Barbara Girerd<sup>3,4</sup>, Nicolas Favrolt<sup>6</sup>, Marianne Riou<sup>7</sup>, Laurence Faivre<sup>8</sup>, Grégoire Manaud<sup>5</sup>, Frédéric Perros<sup>5</sup>, Stefan Gräf <sup>9,10,11</sup>, Nicholas W. Morrell<sup>9,12</sup>, Marc Humbert <sup>3,4,5</sup> and Florent Soubrier <sup>1,2</sup>

**Affiliations:** <sup>1</sup>Hôpital Pitié-Salpêtrière, Département de génétique, Assistance Publique-Hôpitaux de Paris, Paris, France. <sup>2</sup>UMR\_S1166-ICAN, Sorbonne Université, INSERM, Paris, France. <sup>3</sup>Univ. Paris-Sud, Faculté de Médecine, Université Paris-Saclay, Le Kremlin Bicêtre, France. <sup>4</sup>Assistance Publique Hôpitaux de Paris, Service de Pneumologie, Centre de Référence de l'Hypertension Pulmonaire, Hôpital Bicêtre, Le Kremlin Bicêtre, France. <sup>5</sup>UMR\_S 999, Univ. Paris-Sud, INSERM, Hôpital Marie Lannelongue, Le Plessis Robinson, France. <sup>6</sup>Service de Pneumologie et Soins Intensifs Respiratoires, Centre de référence constitutif des maladies pulmonaires rares de l'adulte, Centre de compétence de l'hypertension pulmonaire, CHU Dijon-Bourgogne, Dijon, France. <sup>7</sup>Service de pneumologie, Nouvel hôpital civil, Strasbourg, France. <sup>8</sup>Centre de génétique, FHU TRANSLAD, Institut GIMI et UMR INSERM 1231, CHU de Dijon et Université de Bourgogne, Dijon, France. <sup>9</sup>NIHR Bioresource – Rare Diseases, Cambridge Biomedical Campus, Cambridge, UK. <sup>10</sup>Dept of Medicine, University of Cambridge, Cambridge Biomedical Campus, Cambridge, UK. <sup>11</sup>Dept of Haematology, University of Cambridge, Cambridge Biomedical Campus, Cambridge, UK. <sup>12</sup>Dept of Medicine, University of Cambridge School of Clinical Medicine, Addenbrooke's and Royal Papworth Hospitals, Cambridge, UK. <sup>13</sup>Equally contributing authors.

**Correspondence:** Florent Soubrier, UMR\_S 1166 ICAN, Paris 75634, France. E-mail: florent.soubrier@sorbonne-universite.fr

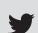

@ERSpublications

***KDR* mutations were identified in two families with a particular form of PAH characterised by low DLCOc and radiological evidence of parenchymal lung disease** <http://bit.ly/30npPPn>

**Cite this article as:** Eyries M, Montani D, Girerd B, *et al.* Familial pulmonary arterial hypertension by *KDR* heterozygous loss of function. *Eur Respir J* 2020; 55: 1902165 [https://doi.org/10.1183/13993003.02165-2019].

This single-page version can be shared freely online.

**ABSTRACT** Beyond the major gene *BMPR2*, several new genes predisposing to PAH have been identified during the last decade. Recently, preliminary evidence of the involvement of the *KDR* gene was found in a large genetic association study.

We prospectively analysed the *KDR* gene by targeted panel sequencing in a series of 311 PAH patients referred to a clinical molecular laboratory for genetic diagnosis of PAH.

Two index cases with severe PAH from two different families were found to carry a loss-of-function mutation in the *KDR* gene. These two index cases were clinically characterised by low diffusing capacity for carbon monoxide adjusted for haemoglobin ( $D_{LCOc}$ ) and interstitial lung disease. In one family, segregation analysis revealed that variant carriers are either presenting with PAH associated with low  $D_{LCOc}$ , or have only decreased  $D_{LCOc}$ , whereas non-carrier relatives have normal  $D_{LCOc}$ . In the second family, a single affected carrier was alive. His carrier mother was unaffected with normal  $D_{LCOc}$ .

We provided genetic evidence for considering *KDR* as a newly identified PAH-causing gene by describing the segregation of *KDR* mutations with PAH in two families. In our study, *KDR* mutations are associated with a particular form of PAH characterised by low  $D_{LCOc}$  and radiological evidence of parenchymal lung disease including interstitial lung disease and emphysema.
